# Supplementary material for: Automated Synthesis of [18F]Flumazenil Application in GABAA Receptor Neuroimaging Availability for Rat Model of Anxiety
Source: MDPI journal article supplement (doi:10.3390/ph16030417), 2023-03-09
Supplement: s1 [file s1]

**Table S1.** The behavioral study of freezing behavior between the closed arm of 1 and 2 using different foot-shock (0.6 and 1.2 mA) and repeat times

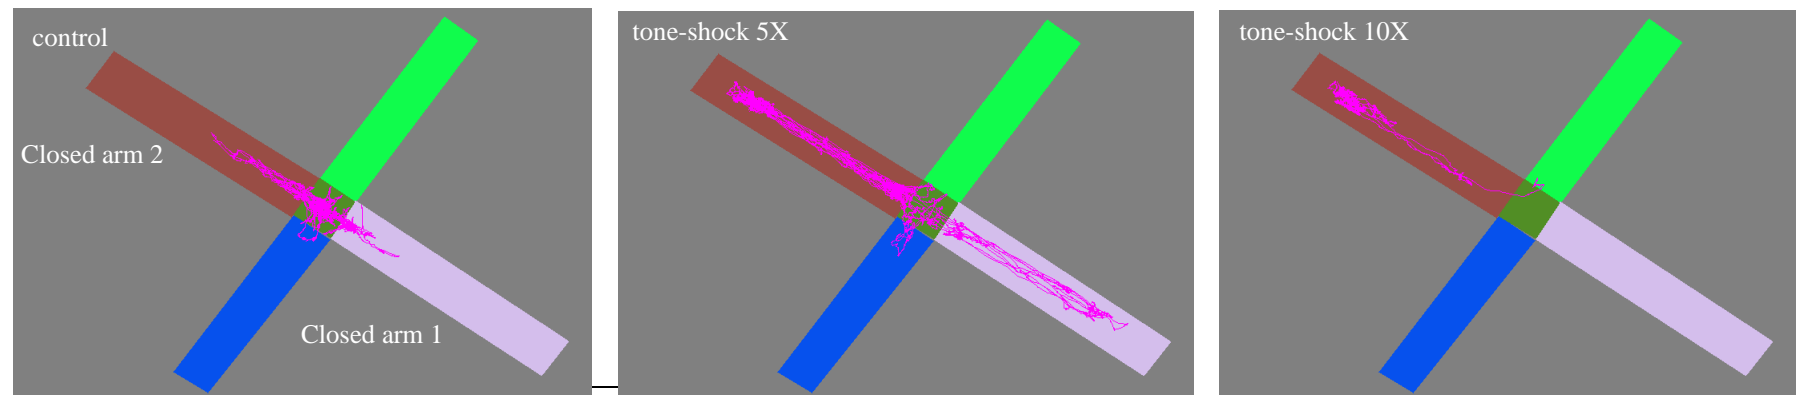

| Freeze (%)      | Mean ± SD     |
|-----------------|---------------|
| Control group   | 26.90 ± 1.37% |
| 0.6mA shock 5x  | 87.19 ± 5.78% |
| 0.6mA shock 10x | 89.01 ± 3.53% |
| 1.2mA shock 10x | 96.83 ± 1.34% |
